# Supplementary material for: OvAd1, a Novel, Potent, and Selective Chimeric Oncolytic Virus Developed for Ovarian Cancer by 3D-Directed Evolution
Source: PubMed Central journal article supplement — Mol Ther Oncolytics. 2016 Dec 14;4:55–66. doi: 10.1016/j.omto.2016.12.001 (PMC5363728; doi:10.1016/j.omto.2016.12.001), 2016-12-14
Supplement: mmc1.pdf [file mmc1.pdf]

**OMTO, Volume 4**

**Supplemental Information**

**OvAd1, a Novel, Potent, and Selective Chimeric  
Oncolytic Virus Developed for Ovarian Cancer  
by 3D-Directed Evolution**

**Irene Kuhn, Maxine Bauzon, Nicola Green, Len Seymour, Kerry Fisher, and Terry Hermiston**

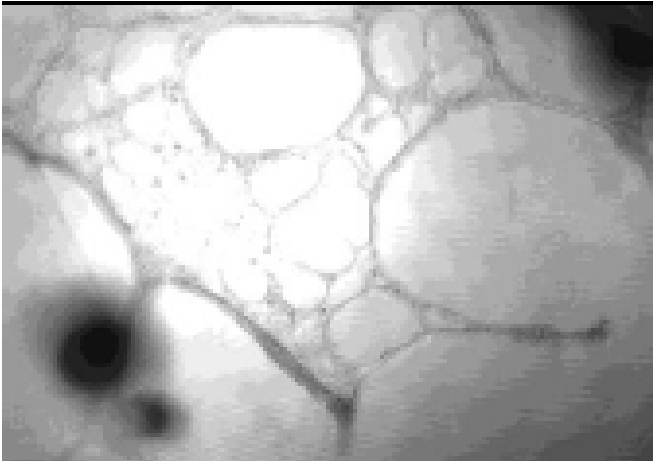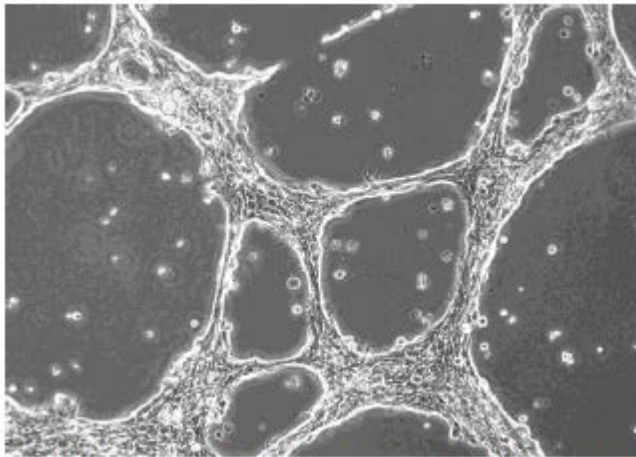

SKOV3 matrigel 1e7 seeded 8-12-03, 2 dps 100x

**Supplementary Figure 1:** Images of SKOV3 soon after seeding onto Matrigel: The first image is focused well-above the surface of the Matrigel in order to reveal the rope-like structures formed by the SKOV3 cells. (The large dark blob at the lower left is a bubble in the Matrigel, quite out of focus). The second image is taken closer to the Matrigel surface, and reveals cellular refraction indicative of the height of the rope-like strands.

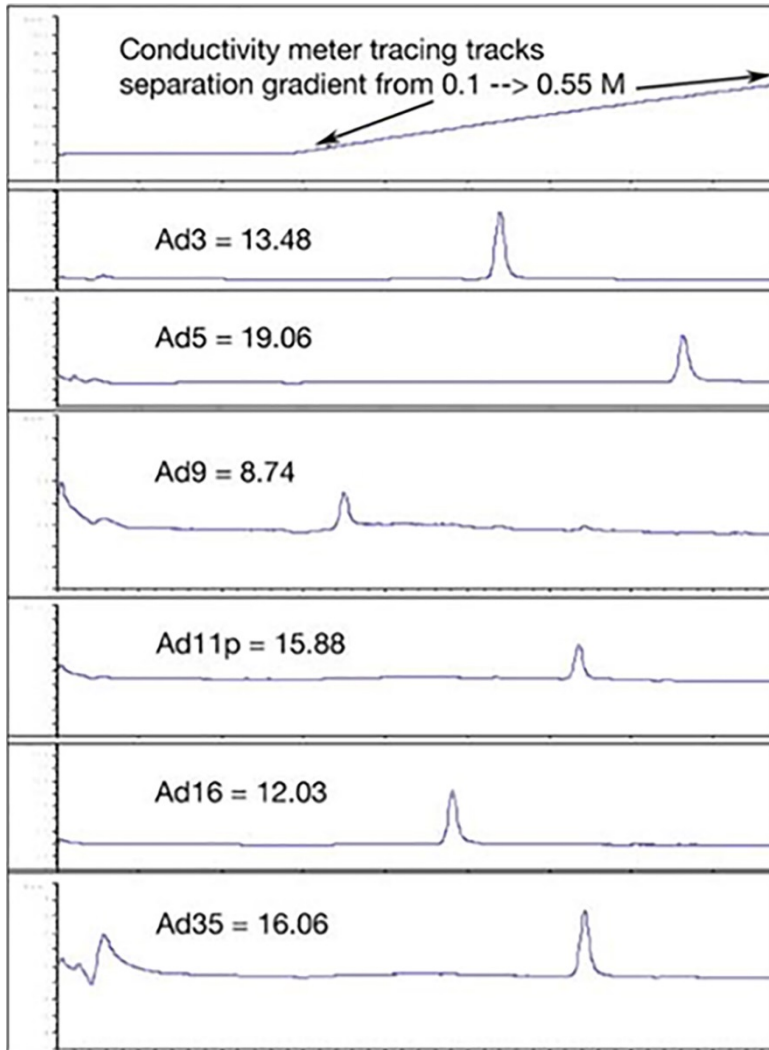

**Supplementary Figure 2:** Below are mAU 260 (y-axis) chromatograms of AIEX-HPLC analyses of pure stocks of adenoviral serotypes. Each purified adenoviral serotype has a distinct AIEX elution position (x-axis=minutes), indicated as number of minutes to elution given the standard separation salt gradient. The position of each narrow peak in the 260 chromatogram is sufficient to both identify the serotype and to quantify the concentration of the stock as viral particles per ml (Figure 1 from Kuhn, *Gene Therapy*, 2007). Chromatograms showing the elution characteristics of additional serotypes are included in Figure 1 of Kuhn et al, *PLoS One*, 2009.

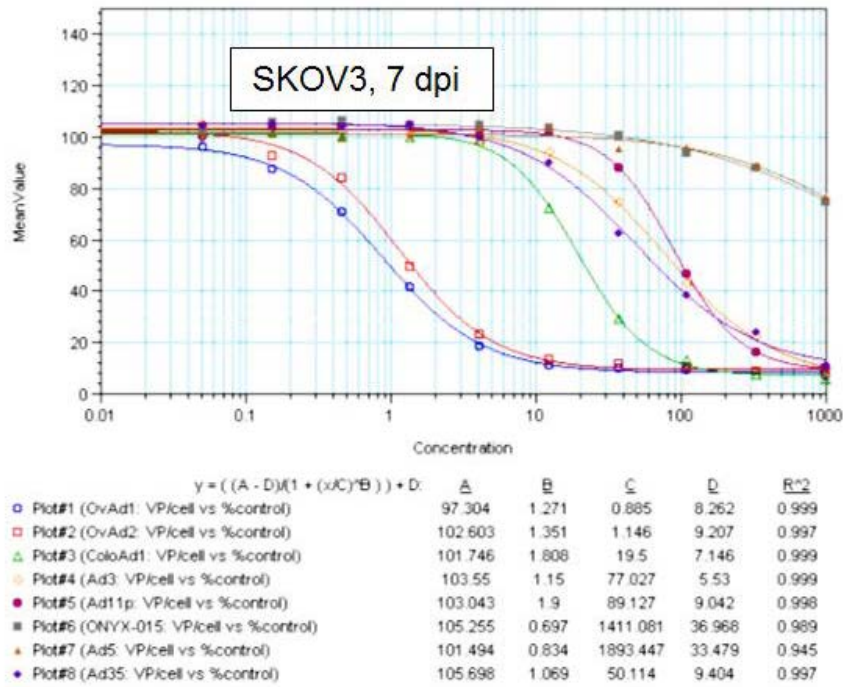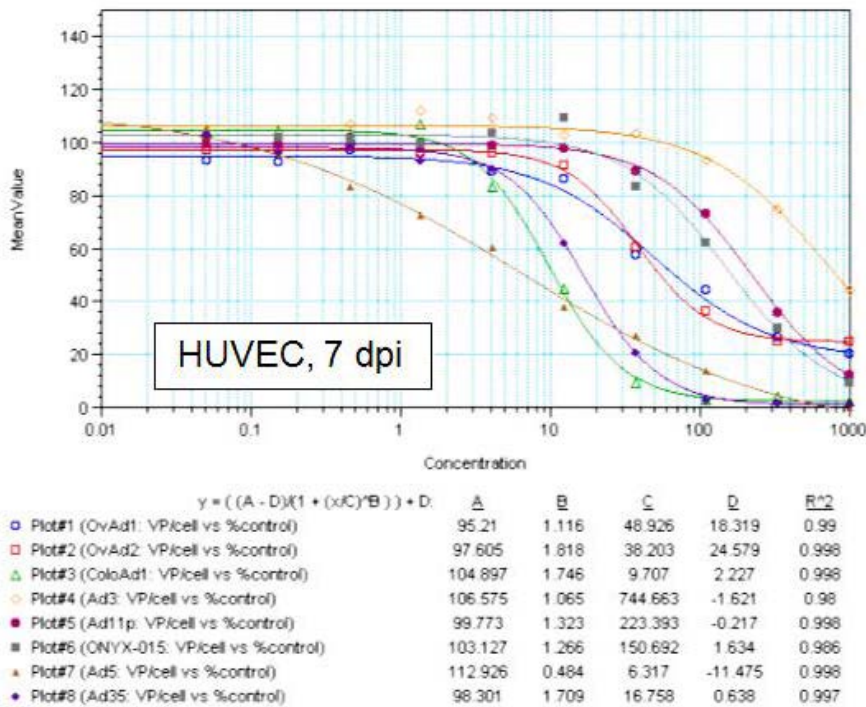

**Supplementary Figure 3:** OvAd1 and OvAd2, the products of directed evolution, acquired 2-3 logs more potency on SKOV3 relative to the viruses in the starting pool; however, their potency on HUVEC was limited relative to the starting pool.
